# Supplementary material
Source: PubMed Central journal article supplement (PMC4750423)
Supplement: supp_fj.15-281543_Supplemental_Figure1.pdf [file supp_fj.15-281543_Supplemental_Figure1.pdf]

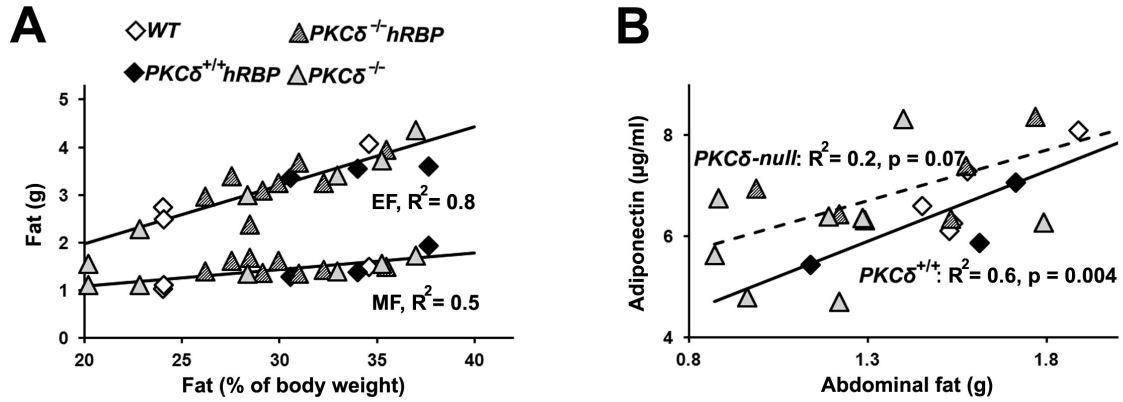

**Figure S1. Effect of genotype on adipose tissue biology.** (A) Correlation between percentage of body fat determined by PIXIMUS and absolute weights of mesenteric and epididymal fat deposits in mice at 10 weeks of age. (B) Correlation between serum adiponectin levels and abdominal fat mass in mice at 17 weeks of age. Data from mice with intact *PKC $\delta$*  represented by a solid trendline; dashed line is the trendline for data from *PKC $\delta$* -null mice;  $n = 3 - 8$  mice per group. Symbols indicating the various groups are the same in (A) and (B).
