# Supplementary material
Source: PubMed Central journal article supplement (PMC4750423)
Supplement: supp_fj.15-281543_Supplemental_Figure2.pdf [file supp_fj.15-281543_Supplemental_Figure2.pdf]

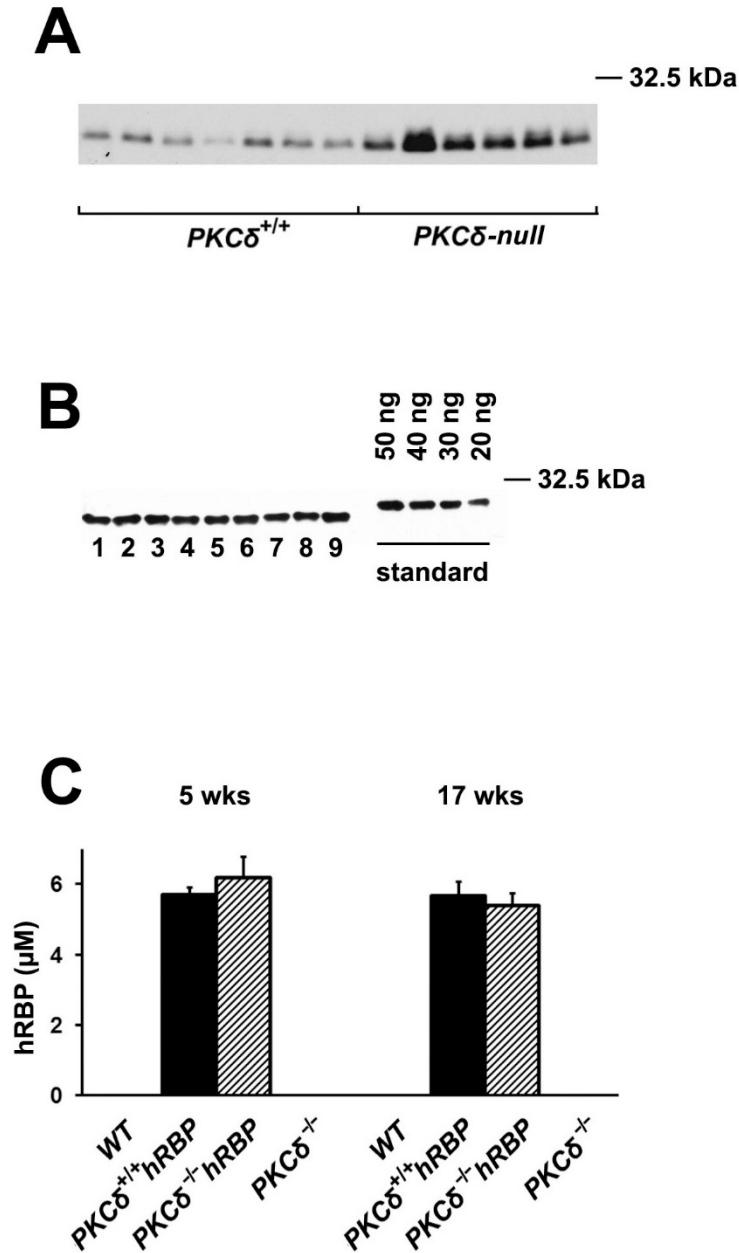

**Figure S2. Serum levels of IL-6 and human RBP.** (A) Representative Western blot of serum samples of mice at 17 wks of age. (B) Western blot analysis of serum samples of *hRBP*-transgenic mice. Representative Western blot of serum samples of *hRBP*-transgenic mice (lanes 1 – 4,  $PKC\delta^{+/+}$ hRBP; lanes 5 – 9  $PKC\delta^{-/-}$ hRBP) and calibration with recombinant human RBP standard. (C) Quantitative analysis by densitometry of human RBP in mouse serum.  $n = 5 - 7$  samples per group. Data are expressed as mean  $\pm$  SE. Weeks of age, wks.
