# Supplementary material
Source: PubMed Central journal article supplement (PMC4750423)
Supplement: supp_fj.15-281543_Supplemental_Figure3.pdf [file supp_fj.15-281543_Supplemental_Figure3.pdf]

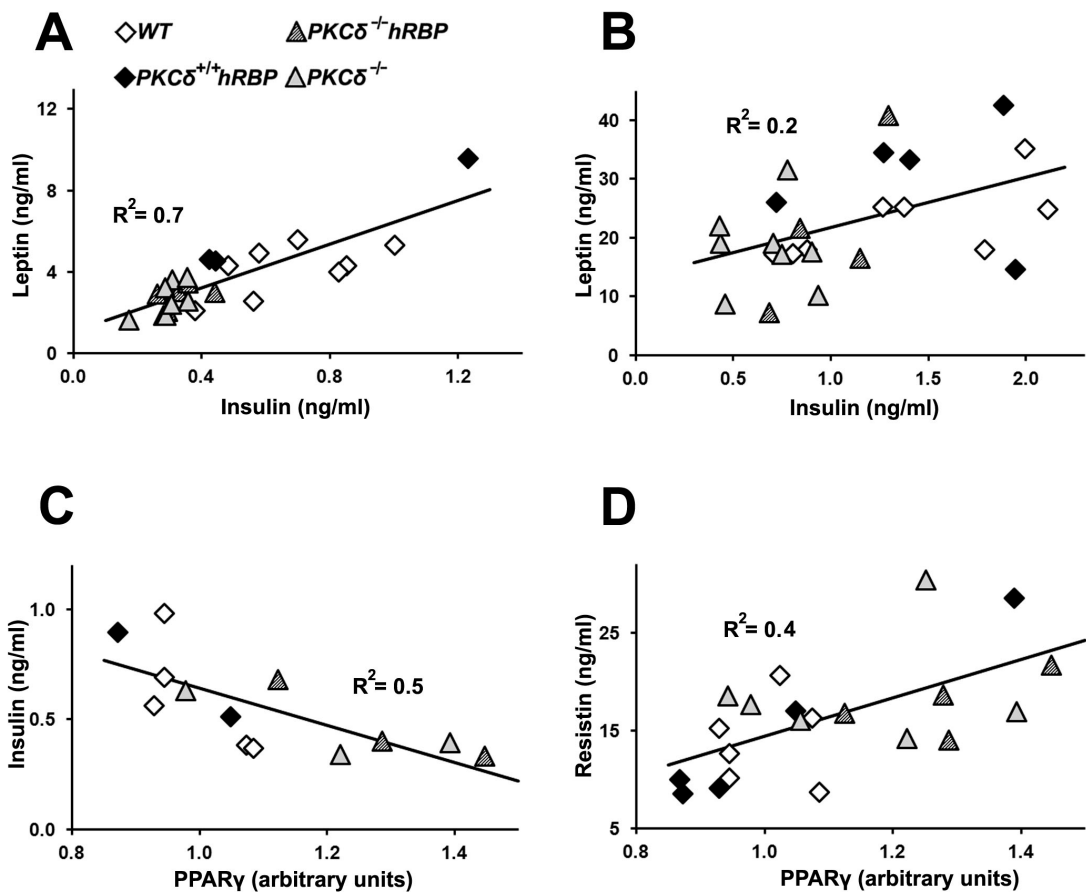

**Figure S3. Correlations between different parameters.** Correlation between serum levels of leptin and insulin in fed mice at 5 (A) and 17 weeks of age (B). Correlation between  $PPAR\gamma$  expression levels in adipose and serum levels of insulin (C) and resistin (D) after overnight fasting in mice at 17 weeks of age. Symbols indicating the various groups are the same in all the panels.
